# Supplementary material for: A promising type-II β-AsP/g-C6N6 van der Waals heterostructure photocatalyst for water splitting: a first-principles study
Source: Royal Society of Chemistry journal article supplement (doi:10.1039/d2cp03247c), 2022-01-01
Supplement: d2cp03247c1.pdf [file d2cp03247c1.pdf]

## Supporting Information

### A promising photocatalyst of type-II $\beta$ -AsP/g-C<sub>6</sub>N<sub>6</sub> van der Waals heterostructure for water splitting: A first-principles study

Huiyan Zhao <sup>a,b</sup>, Baonan Jia <sup>a,b,\*</sup>, Xiaoning Guan <sup>a,c</sup>, Yingjie Chen <sup>a,b</sup>, Xiaoling Zhu <sup>d</sup>, Lihong Han <sup>a,b</sup>,

Pengfei Lu <sup>a,b,\*</sup>

<sup>a</sup>. State Key Laboratory of Information Photonics and Optical Communications, Beijing University of Posts and Telecommunications, Beijing 100876, P. R. China

<sup>b</sup>. School of Electronic Engineering, Beijing University of Posts and Telecommunications, Beijing 100876, P. R. China

<sup>c</sup>. School of Information and Communication Engineering, Beijing University of Posts and Telecommunications, Beijing 100876, P. R. China

<sup>d</sup>. School of Electronic Information and Electrical Engineering, Chengdu University, Chengdu 610106, P.R. China

Email: jiabaonan@163.com, photon.bupt@gmail.com

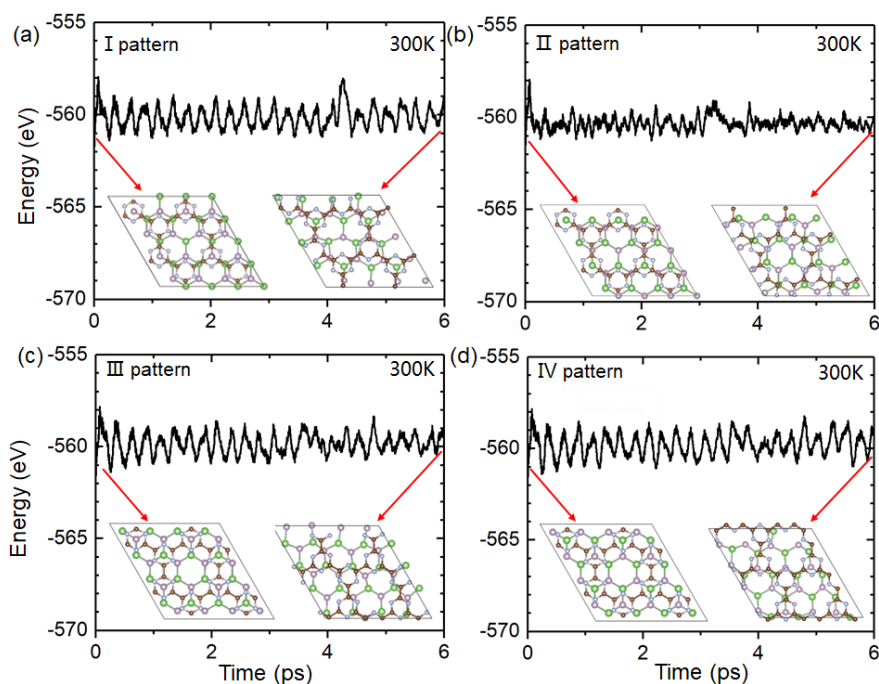

Fig. S1 Variations of energy for  $\beta$ -AsP/g-C<sub>6</sub>N<sub>6</sub> heterostructure during AIMD simulation lasting for 6 ps at 300 K. The insets represent the top views of initial and final structures in AIMD simulation, respectively.

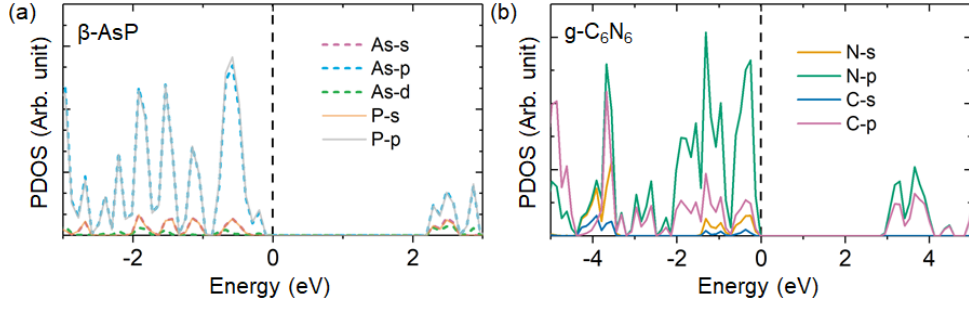

Fig. S2 The density of states of (a)  $\beta$ -AsP and (b)  $g$ -C<sub>6</sub>N<sub>6</sub> monolayers. The Fermi levels are set to 0, represented by the horizontal dotted black lines.

We calculated the band structures of  $\beta$ -AsP and  $g$ -C<sub>6</sub>N<sub>6</sub> monolayer by PBE for comparison, shown in Fig. 1(c-d).  $\beta$ -AsP ( $g$ -C<sub>6</sub>N<sub>6</sub>) is an indirect (a direct) semiconductor and their band gaps are 1.89 eV and 2.52 eV, respectively. The gaps are consistent with previous results: 1.84 eV<sup>1</sup> for  $\beta$ -AsP at the PBE level.

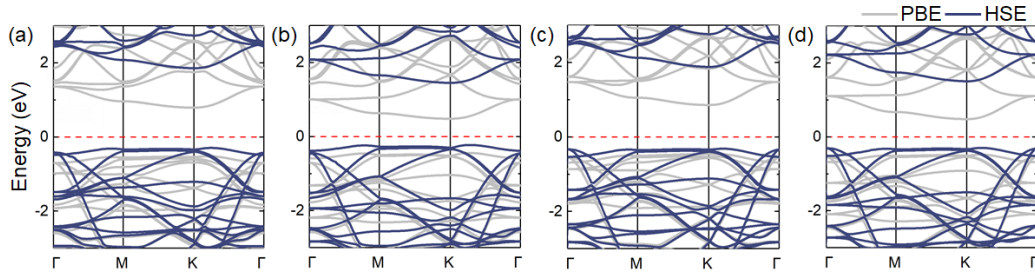

Fig. S3 The band structure of  $\beta$ -AsP/ $g$ -C<sub>6</sub>N<sub>6</sub> heterostructures in (a) I pattern, (b) II pattern, (c) III pattern, and (d) IV pattern by PBE (gray lines) and HSE06 functional (dark blue lines).

The results show that the energy bands calculated by PBE and HSE06 functional are consistent, only the upward shifts of conduction bands and the downward shifts of valence bands. The band gaps by PBE are listed in Table 1.

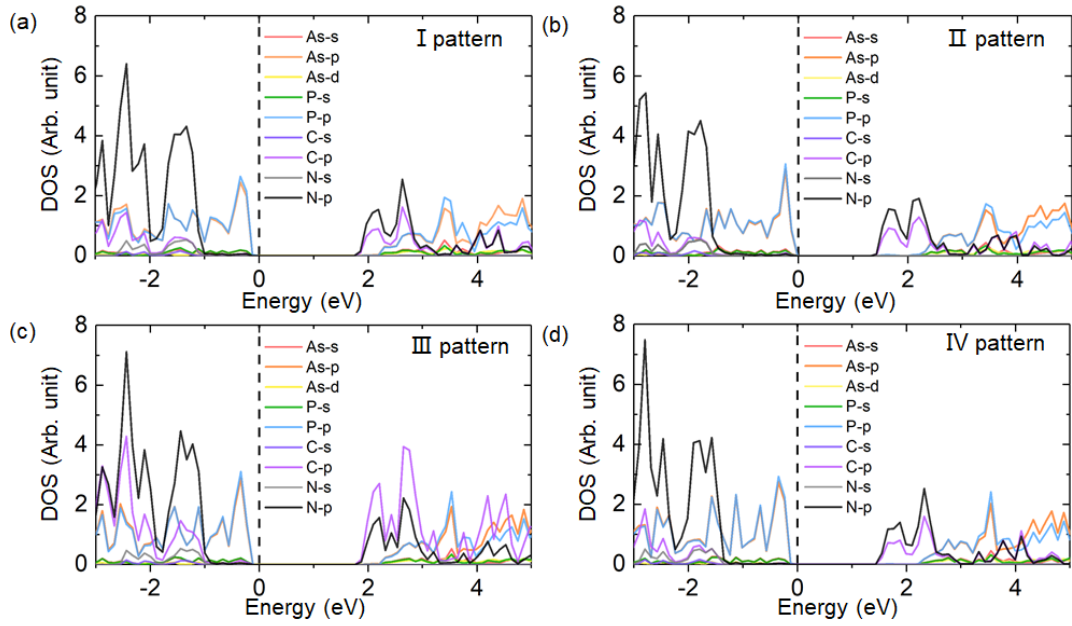

Fig. S4 The density of states of  $\beta$ -AsP/g- $C_6N_6$  heterostructures in (a) I pattern, (b) II pattern, (c) III pattern, and (d) IV pattern. The Fermi levels are set to 0, represented by the horizontal dotted black lines.

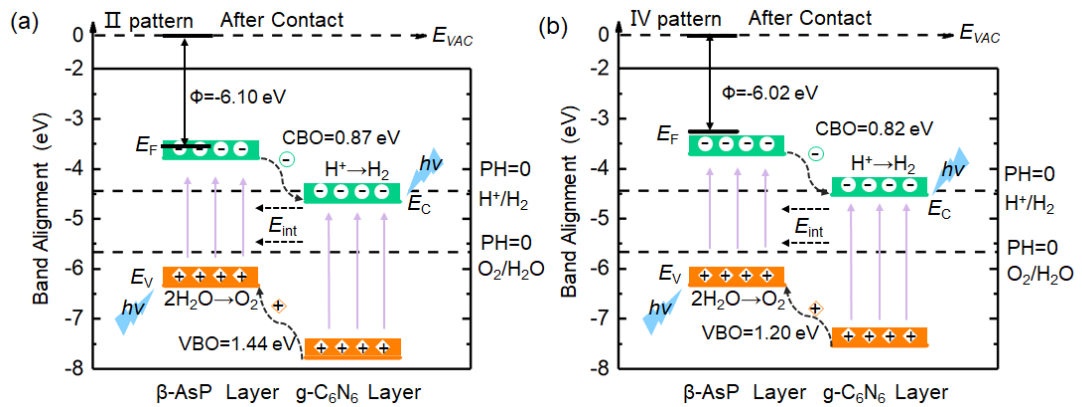

Fig. S5 The schematic diagram of photocatalysis of  $\beta$ -AsP/g- $C_6N_6$  heterostructure in (a) II and (b) IV patterns. The  $E_{vac}$  is set to zero.

## References

1. X. Cai, Y. Chen, B. Sun, J. Chen, H. Wang, Y. Ni, L. Tao, H. Wang, S. Zhu, X. Li, *Nanoscale*, 2019, **11**, 8260-8269.
